# Supplementary material for: Revealing the nonlinear transition of beam-driven plasma wakefield
Source: Research Square preprint supplement (doi:10.21203/rs.3.rs-5532767/v1), 2025-10-01
Supplement: Supplementary file 1 [file e6326a83ca892764a9c1613c.pdf]

## Supplementary Materials

Yang Wan,<sup>1,\*</sup> Sheroy Tata,<sup>2</sup> Omri Seemann,<sup>2</sup> Bo Peng,<sup>1</sup>

Eitan Y. Levine,<sup>2</sup> Eyal Kroupp,<sup>2</sup> and Victor Malka<sup>2,†</sup>

<sup>1</sup>*Laboratory of Zhongyuan Light, School of Physics,*

*Zhengzhou University, Zhengzhou, 450001, China*

<sup>2</sup>*Department of Physics of Complex Systems,*

*Weizmann Institute of Science, Rehovot 7610001, Israel*

(Dated: November 27, 2024)

The Supplementary contains 3 Figures as complements to the main content, which are shortly described as follows,

S-Figure 1 shows the energy spectra and angular distributions of the probe electron beams in ten consecutive shots.

S-Figure 2 shows the energy spectra of the PWFA electron driver to be probed for ten consecutive shots with input laser energy of 550 mJ.

S-Figure 3 compares the field distributions created by one short bunch and by one short bunch followed by a long bunch.

---

\* [yangwan23@zzu.edu.cn](mailto:yangwan23@zzu.edu.cn)

† [victor.malka@weizmann.ac.il](mailto:victor.malka@weizmann.ac.il)

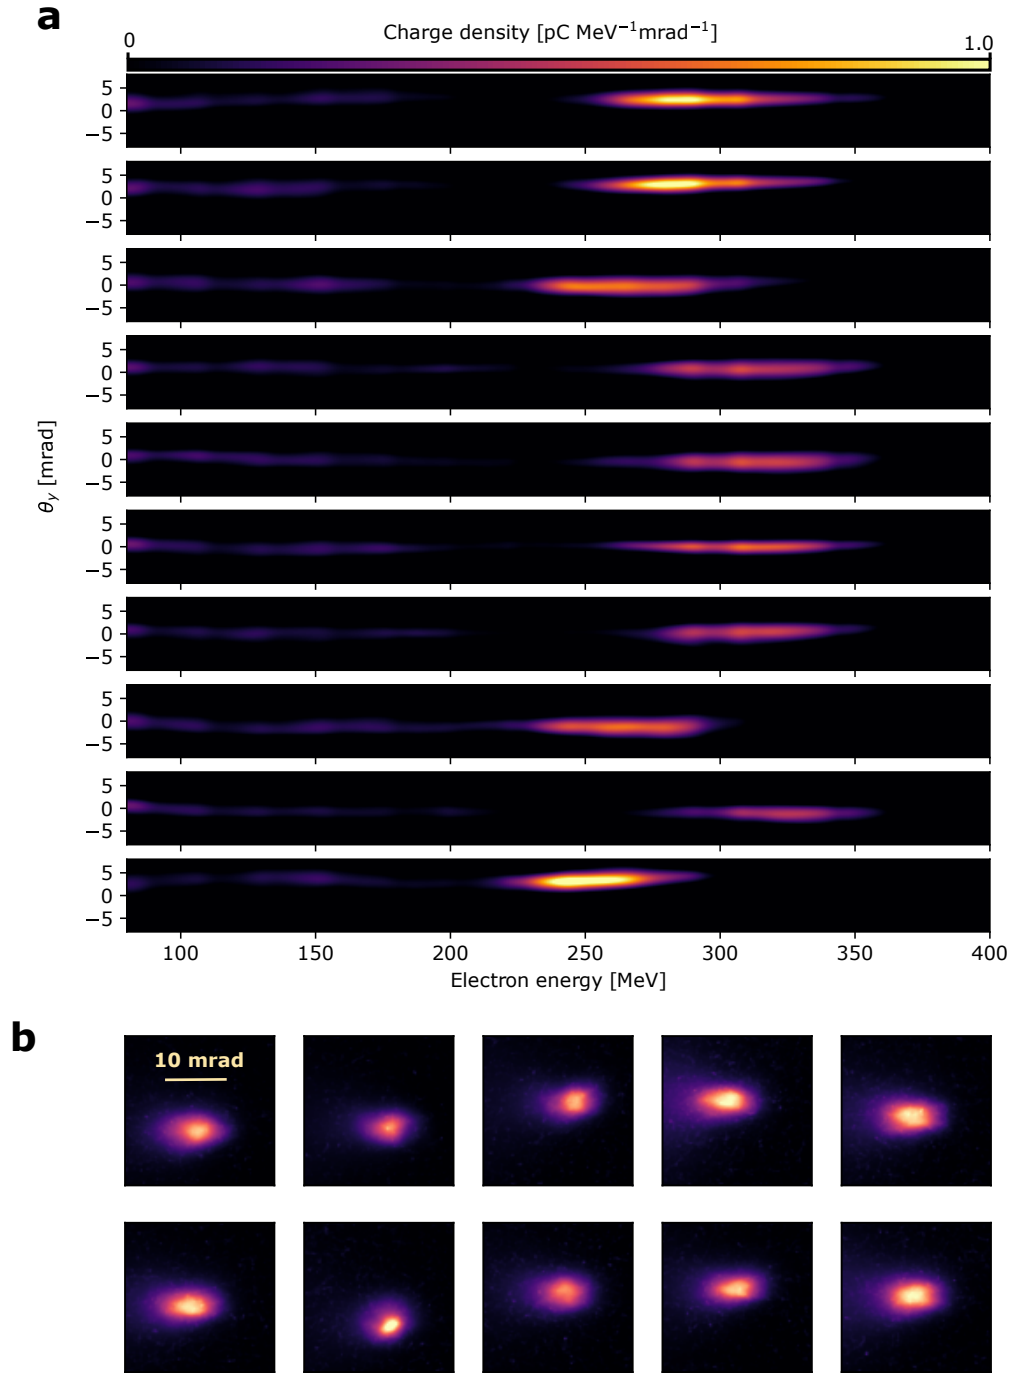

S-Fig. 1. (a) Energy spectra of the probe electron beam in ten consecutive shots. (b) Angular profiles of the probe electron beam in ten consecutive shots.

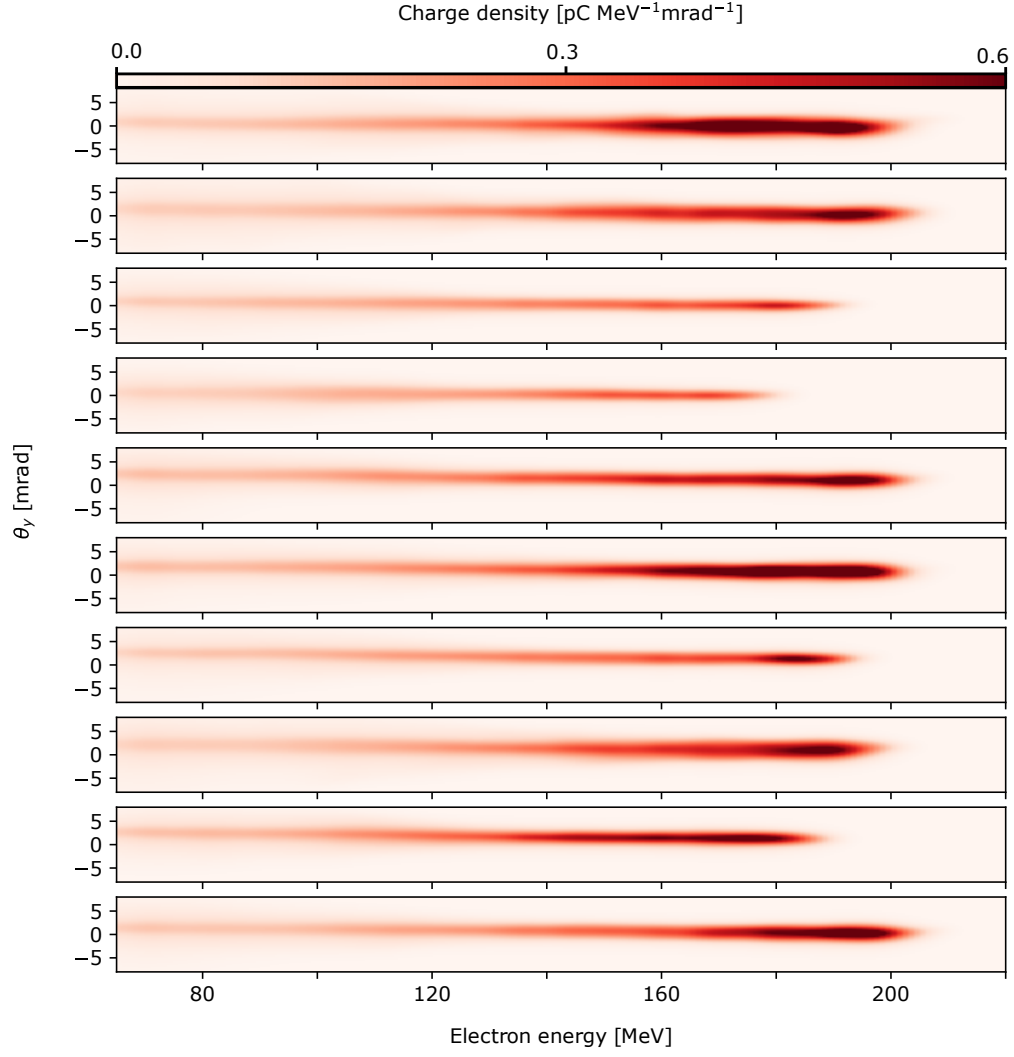

S-Fig. 2. Energy spectra of of the PWFA electron driver to be probed for ten consecutive shots with input laser energy of 500 mJ.

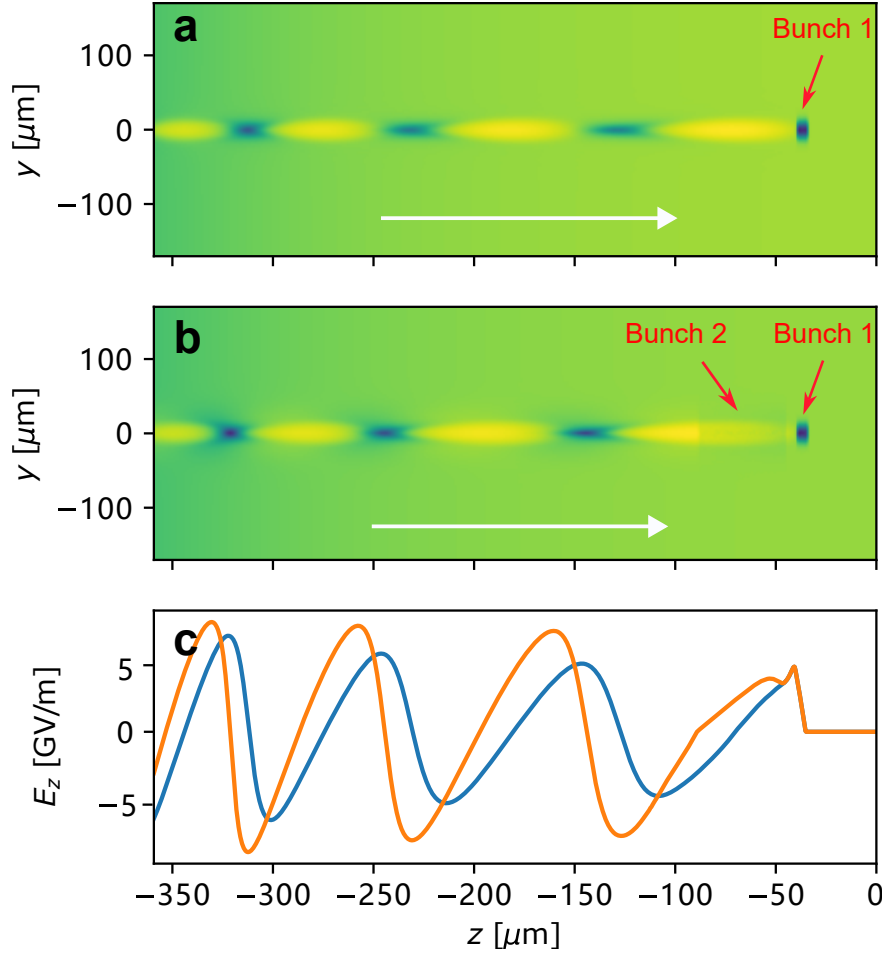

S-Fig. 3. (a) The simulated density distribution of the plasma wake driven by one short electron bunch of 100 pC with RMS radii of 8  $\mu\text{m}$  and a pulse duration of 10 fs. (b) The simulated density distribution of the plasma wake driven by the same short electron bunch as above, followed by a long bunch of 200 pC with RMS radii of 20  $\mu\text{m}$  and a pulse duration of 120 fs. (c) The  $E_z$  field longitudinal lineouts along the center axis of (a) (blue solid curve) and (b) (orange solid curve).
